# Supplementary material
Source: publisher figshare collection journal article supplement (https://acs.figshare.com/ndownloader/files/5123944)
Supplement: Supplementary file 1 [file 5123944]

 
data_Lanthanum_a1P2W17O61_1to2 
 
_audit_creation_method            SHELXL-97 
_chemical_name_systematic 
; 
 ? 
; 
_chemical_name_common             ? 
_chemical_melting_point           ? 
_chemical_formula_moiety          ? 
_chemical_formula_sum 
 'K14 La O158 P4 W34' 
_chemical_formula_weight          9589.09 
 
loop_ 
 _atom_type_symbol 
 _atom_type_description 
 _atom_type_scat_dispersion_real 
 _atom_type_scat_dispersion_imag 
 _atom_type_scat_source 
 'O'  'O'   0.0106   0.0060 
 'International Tables Vol C Tables 4.2.6.8 and 6.1.1.4' 
 'P'  'P'   0.1023   0.0942 
 'International Tables Vol C Tables 4.2.6.8 and 6.1.1.4' 
 'K'  'K'   0.2009   0.2494 
 'International Tables Vol C Tables 4.2.6.8 and 6.1.1.4' 
 'La'  'La'  -0.2871   2.4523 
 'International Tables Vol C Tables 4.2.6.8 and 6.1.1.4' 
 'W'  'W'  -0.8490   6.8722 
 'International Tables Vol C Tables 4.2.6.8 and 6.1.1.4' 
 
_symmetry_cell_setting            ? 
_symmetry_space_group_name_H-M    ? 
 
loop_ 
 _symmetry_equiv_pos_as_xyz 
 'x, y, z' 
 '-x, y, -z+1/2' 
 'x+1/2, y+1/2, z' 
 '-x+1/2, y+1/2, -z+1/2' 
 '-x, -y, -z' 
 'x, -y, z-1/2' 
 '-x+1/2, -y+1/2, -z' 
 'x+1/2, -y+1/2, z-1/2' 
 
_cell_length_a                    41.339(8) 
_cell_length_b                    15.636(3) 
_cell_length_c                    24.988(5) 
_cell_angle_alpha                 90.00 
_cell_angle_beta                  104.53(3) 
_cell_angle_gamma                 90.00 
_cell_volume                      15635(5) 
_cell_formula_units_Z             4 
_cell_measurement_temperature     293(2) 
_cell_measurement_reflns_used     ? 
_cell_measurement_theta_min       ? 
_cell_measurement_theta_max       ? 
 
_exptl_crystal_description        ? 
_exptl_crystal_colour             ? 
_exptl_crystal_size_max           ? 
_exptl_crystal_size_mid           ? 
_exptl_crystal_size_min           ? 
_exptl_crystal_density_meas       ? 
_exptl_crystal_density_diffrn     4.074 
_exptl_crystal_density_method     'not measured' 
_exptl_crystal_F_000              16652 
_exptl_absorpt_coefficient_mu     25.692 
_exptl_absorpt_correction_type    ? 
_exptl_absorpt_correction_T_min   ? 
_exptl_absorpt_correction_T_max   ? 
_exptl_absorpt_process_details    ? 
 
_exptl_special_details 
; 
 ? 
; 
 
_diffrn_ambient_temperature       293(2) 
_diffrn_radiation_wavelength      0.71073 
_diffrn_radiation_type            MoK\a 
_diffrn_radiation_source          'fine-focus sealed tube' 
_diffrn_radiation_monochromator   graphite 
_diffrn_measurement_device_type   ? 
_diffrn_measurement_method        ? 
_diffrn_detector_area_resol_mean  ? 
_diffrn_standards_number          ? 
_diffrn_standards_interval_count  ? 
_diffrn_standards_interval_time   ? 
_diffrn_standards_decay_%         ? 
_diffrn_reflns_number             34400 
_diffrn_reflns_av_R_equivalents   0.0557 
_diffrn_reflns_av_sigmaI/netI     0.0661 
_diffrn_reflns_limit_h_min        -53 
_diffrn_reflns_limit_h_max        53 
_diffrn_reflns_limit_k_min        -20 
_diffrn_reflns_limit_k_max        20 
_diffrn_reflns_limit_l_min        -32 
_diffrn_reflns_limit_l_max        32 
_diffrn_reflns_theta_min          1.40 
_diffrn_reflns_theta_max          27.57 
_reflns_number_total              17934 
_reflns_number_gt                 12594 
_reflns_threshold_expression      >2sigma(I) 
 
_computing_data_collection        ? 
_computing_cell_refinement        ? 
_computing_data_reduction         ? 
_computing_structure_solution     'SHELXS-97 (Sheldrick, 1990)' 
_computing_structure_refinement   'SHELXL-97 (Sheldrick, 1997)' 
_computing_molecular_graphics     ? 
_computing_publication_material   ? 
 
_refine_special_details 
; 
 Refinement of F^2^ against ALL reflections.  The weighted R-factor wR and 
 goodness of fit S are based on F^2^, conventional R-factors R are based 
 on F, with F set to zero for negative F^2^. The threshold expression of 
 F^2^ > 2sigma(F^2^) is used only for calculating R-factors(gt) etc. and is 
 not relevant to the choice of reflections for refinement.  R-factors based 
 on F^2^ are statistically about twice as large as those based on F, and R- 
 factors based on ALL data will be even larger. 
; 
 
_refine_ls_structure_factor_coef  Fsqd  
_refine_ls_matrix_type            full 
_refine_ls_weighting_scheme       calc  
_refine_ls_weighting_details 
 'calc w=1/[\s^2^(Fo^2^)+(0.1104P)^2^+2917.2334P] where P=(Fo^2^+2Fc^2^)/3' 
_atom_sites_solution_primary      direct 
_atom_sites_solution_secondary    difmap 
_atom_sites_solution_hydrogens    geom 
_refine_ls_hydrogen_treatment     mixed 
_refine_ls_extinction_method      none 
_refine_ls_extinction_coef        ? 
_refine_ls_number_reflns          17934 
_refine_ls_number_parameters      568 
_refine_ls_number_restraints      0 
_refine_ls_R_factor_all           0.1162 
_refine_ls_R_factor_gt            0.0744 
_refine_ls_wR_factor_ref          0.2360 
_refine_ls_wR_factor_gt           0.1953 
_refine_ls_goodness_of_fit_ref    1.070 
_refine_ls_restrained_S_all       1.070 
_refine_ls_shift/su_max           0.002 
_refine_ls_shift/su_mean          0.000 
 
loop_ 
 _atom_site_label 
 _atom_site_type_symbol 
 _atom_site_fract_x 
 _atom_site_fract_y 
 _atom_site_fract_z 
 _atom_site_U_iso_or_equiv 
 _atom_site_adp_type 
 _atom_site_occupancy 
 _atom_site_symmetry_multiplicity 
 _atom_site_calc_flag 
 _atom_site_refinement_flags 
 _atom_site_disorder_assembly 
 _atom_site_disorder_group 
W1 W 0.09244(2) 0.10038(7) 1.03130(4) 0.0233(2) Uani 1 1 d . . . 
W2 W 0.02275(2) 0.07338(7) 0.90275(3) 0.0202(2) Uani 1 1 d . . . 
W3 W 0.03694(3) 0.28133(7) 0.97872(4) 0.0289(2) Uani 1 1 d . . . 
W4 W 0.15812(2) 0.22013(8) 1.02124(4) 0.0311(3) Uani 1 1 d . . . 
W5 W 0.06439(2) -0.03596(7) 0.75190(4) 0.0252(2) Uani 1 1 d . . . 
W6 W 0.06519(3) -0.12746(7) 0.87213(4) 0.0271(2) Uani 1 1 d . . . 
W7 W 0.09266(2) 0.28184(8) 0.77711(4) 0.0315(3) Uani 1 1 d . . . 
W8 W 0.13867(2) 0.09160(9) 0.74297(4) 0.0372(3) Uani 1 1 d . . . 
W9 W 0.13498(3) -0.09488(8) 0.99606(4) 0.0323(3) Uani 1 1 d . . . 
W10 W 0.16004(3) 0.31633(10) 0.88759(5) 0.0441(3) Uani 1 1 d . . . 
W11 W 0.20082(2) 0.02205(10) 0.98638(4) 0.0391(3) Uani 1 1 d . . . 
W12 W 0.10232(3) 0.40277(8) 0.96772(5) 0.0387(3) Uani 1 1 d . . . 
La1 La 0.0000 0.16333(13) 0.7500 0.0197(4) Uani 1 2 d S . . 
W14 W 0.03575(3) 0.36980(7) 0.85322(4) 0.0320(3) Uani 1 1 d . . . 
W15 W 0.20337(3) 0.12006(11) 0.85343(4) 0.0494(4) Uani 1 1 d . . . 
W16 W 0.21317(3) -0.11506(12) 0.87055(5) 0.0591(5) Uani 1 1 d . . . 
W17 W 0.14704(4) -0.23373(10) 0.88149(5) 0.0518(4) Uani 1 1 d . . . 
W18 W 0.14724(3) -0.14194(11) 0.75775(4) 0.0486(4) Uani 1 1 d . . . 
P1 P 0.13602(15) -0.0126(5) 0.8656(3) 0.0307(16) Uani 1 1 d . . . 
P2 P 0.09041(14) 0.1969(5) 0.9054(2) 0.0263(14) Uani 1 1 d . . . 
O21 O -0.0048(4) 0.1044(11) 0.8395(7) 0.023(3) Uiso 1 1 d . . . 
O35 O 0.0602(4) 0.0551(10) 0.9748(6) 0.021(3) Uiso 1 1 d . . . 
O39 O 0.0589(4) 0.2124(11) 0.7603(7) 0.025(3) Uiso 1 1 d . . . 
O17 O -0.0058(4) 0.0241(11) 0.9329(7) 0.025(3) Uiso 1 1 d . . . 
O16 O 0.0400(5) -0.2065(13) 0.8863(8) 0.037(4) Uiso 1 1 d . . . 
O43 O 0.1854(5) 0.1209(13) 0.7764(8) 0.037(4) Uiso 1 1 d . . . 
O5 O 0.0688(4) 0.2066(10) 1.0255(6) 0.020(3) Uiso 1 1 d . . . 
O9 O 0.0131(4) 0.2807(12) 0.8188(7) 0.031(4) Uiso 1 1 d . . . 
O50 O 0.0429(4) -0.0623(11) 0.6854(6) 0.022(3) Uiso 1 1 d . . . 
O40 O 0.0933(4) -0.1055(11) 0.9437(7) 0.024(3) Uiso 1 1 d . . . 
O41 O 0.0508(4) -0.1264(11) 0.7948(7) 0.023(3) Uiso 1 1 d . . . 
O8 O 0.0703(5) 0.3612(13) 0.8156(8) 0.035(4) Uiso 1 1 d . . . 
O42 O 0.0963(4) 0.0448(11) 0.7369(7) 0.026(4) Uiso 1 1 d . . . 
O32 O 0.0634(4) 0.1337(11) 0.8793(7) 0.024(3) Uiso 1 1 d . . . 
O11 O 0.0396(4) -0.0307(10) 0.8802(6) 0.021(3) Uiso 1 1 d . . . 
O19 O 0.0888(5) 0.3408(13) 0.7176(8) 0.035(4) Uiso 1 1 d . . . 
O52 O 0.1913(5) 0.2581(14) 1.0725(8) 0.039(5) Uiso 1 1 d . . . 
O18 O 0.0816(4) 0.0637(12) 1.0891(7) 0.031(4) Uiso 1 1 d . . . 
O14 O 0.1790(5) 0.1102(12) 1.0139(7) 0.032(4) Uiso 1 1 d . . . 
O46 O 0.0703(5) 0.4456(14) 0.9106(8) 0.040(5) Uiso 1 1 d . . . 
O47 O 0.0169(5) 0.3567(12) 0.9177(8) 0.034(4) Uiso 1 1 d . . . 
O4 O 0.0190(4) 0.1843(11) 0.9380(7) 0.027(4) Uiso 1 1 d . . . 
O37 O 0.1707(5) 0.2593(13) 0.9584(8) 0.037(4) Uiso 1 1 d . . . 
O51 O 0.2396(5) 0.0314(13) 1.0324(8) 0.038(4) Uiso 1 1 d . . . 
O26 O 0.0731(4) 0.2796(11) 0.9198(7) 0.025(4) Uiso 1 1 d . . . 
O53 O 0.1032(5) -0.1214(13) 0.7497(8) 0.034(4) Uiso 1 1 d . . . 
O1 O 0.0097(5) 0.2954(13) 1.0207(8) 0.035(4) Uiso 1 1 d . . . 
O33 O 0.1809(5) -0.0612(13) 1.0242(8) 0.035(4) Uiso 1 1 d . . . 
O13 O 0.1218(4) 0.0040(11) 1.0240(7) 0.026(4) Uiso 1 1 d . . . 
O36 O 0.1339(4) 0.1638(11) 1.0656(7) 0.024(3) Uiso 1 1 d . . . 
O45 O 0.0691(5) 0.3725(12) 1.0055(8) 0.033(4) Uiso 1 1 d . . . 
O34 O 0.2538(6) -0.1484(17) 0.8816(10) 0.058(6) Uiso 1 1 d . . . 
O44 O 0.2065(5) 0.0948(14) 0.9282(9) 0.043(5) Uiso 1 1 d . . . 
O49 O 0.1369(5) 0.1113(13) 0.6753(8) 0.039(5) Uiso 1 1 d . . . 
O29 O 0.1480(4) 0.0661(12) 0.8374(7) 0.030(4) Uiso 1 1 d . . . 
O15 O 0.1304(5) -0.1652(14) 1.0469(8) 0.041(5) Uiso 1 1 d . . . 
O54 O 0.1014(4) -0.2024(12) 0.8656(7) 0.032(4) Uiso 1 1 d . . . 
O27 O 0.1463(4) -0.0035(12) 0.9291(7) 0.029(4) Uiso 1 1 d . . . 
O20 O 0.1937(6) 0.3872(16) 0.8973(10) 0.052(6) Uiso 1 1 d . . . 
O38 O 0.1360(5) 0.3427(13) 0.8179(8) 0.033(4) Uiso 1 1 d . . . 
O12 O 0.1813(5) 0.2223(13) 0.8581(8) 0.040(5) Uiso 1 1 d . . . 
O2 O 0.0128(5) 0.4567(14) 0.8208(9) 0.042(5) Uiso 1 1 d . . . 
O6 O 0.1307(5) 0.3143(13) 1.0149(8) 0.035(4) Uiso 1 1 d . . . 
O23 O 0.1552(5) -0.0281(13) 0.7430(8) 0.038(5) Uiso 1 1 d . . . 
O28 O 0.0982(4) -0.0272(11) 0.8441(7) 0.024(3) Uiso 1 1 d . . . 
O22 O 0.1503(5) -0.1801(13) 0.9506(8) 0.036(4) Uiso 1 1 d . . . 
O24 O 0.1446(5) -0.2442(15) 0.8041(9) 0.045(5) Uiso 1 1 d . . . 
O30 O 0.1117(4) 0.2258(11) 0.8660(7) 0.024(3) Uiso 1 1 d . . . 
O48 O 0.2431(6) 0.1622(15) 0.8559(9) 0.049(5) Uiso 1 1 d . . . 
O31 O 0.1129(4) 0.1614(11) 0.9598(6) 0.023(3) Uiso 1 1 d . . . 
O7 O 0.1328(5) 0.3846(13) 0.9209(8) 0.040(5) Uiso 1 1 d . . . 
O25 O 0.1542(5) -0.0965(13) 0.8502(8) 0.039(5) Uiso 1 1 d . . . 
O3 O 0.1191(6) 0.4937(16) 1.0031(9) 0.050(5) Uiso 1 1 d . . . 
O59 O 0.2123(5) -0.0685(14) 0.9412(9) 0.043(5) Uiso 1 1 d . . . 
O55 O 0.1963(5) -0.1496(14) 0.7968(8) 0.042(5) Uiso 1 1 d . . . 
O57 O 0.1501(6) -0.1955(16) 0.6986(10) 0.052(6) Uiso 1 1 d . . . 
O56 O 0.1948(6) -0.2188(15) 0.8936(9) 0.049(5) Uiso 1 1 d . . . 
O58 O 0.1460(7) -0.3443(18) 0.8982(11) 0.063(7) Uiso 1 1 d . . . 
O60 O 0.2137(5) -0.0011(14) 0.8475(9) 0.044(5) Uiso 1 1 d . . . 
O10 O 0.1239(4) 0.1967(12) 0.7620(7) 0.028(4) Uiso 1 1 d . . . 
K2 K 0.2436(2) 0.1565(9) 1.1188(4) 0.088(3) Uani 1 1 d . . . 
K1 K -0.0623(3) 0.2823(9) 0.9856(6) 0.106(4) Uani 1 1 d . . . 
O61 O 0.0384(4) 0.0418(10) 0.7702(6) 0.019(3) Uiso 1 1 d . . . 
K4 K 0.06700(13) -0.0891(4) 1.1265(2) 0.0320(13) Uani 1 1 d . . . 
K5 K 0.01881(15) -0.1464(5) 0.5904(2) 0.0368(14) Uani 1 1 d . . . 
K6 K 0.1119(5) 0.3179(12) 1.1200(7) 0.139(6) Uani 1 1 d . . . 
O62 O 0.0507(5) -0.2599(15) 1.1214(9) 0.045(5) Uiso 1 1 d . . . 
O63 O -0.0414(5) 0.1166(13) 0.9937(8) 0.039(5) Uiso 1 1 d . . . 
O64 O 0.1840(5) 0.0467(14) 1.1366(9) 0.042(5) Uiso 1 1 d . . . 
O65 O 0.1954(7) 0.3404(18) 1.1778(11) 0.064(7) Uiso 1 1 d . . . 
O66 O 0.2869(9) -0.084(2) 1.0962(14) 0.090(10) Uiso 1 1 d . . . 
O67 O 0.0019(10) -0.362(3) 0.8537(16) 0.104(11) Uiso 1 1 d . . . 
O68 O 0.3079(9) -0.022(2) 1.0385(15) 0.094(10) Uiso 1 1 d . . . 
O69 O 0.2199(9) -0.224(2) 1.0195(14) 0.092(10) Uiso 1 1 d . . . 
K7 K 0.0000 -0.254(3) 0.7500 0.29(2) Uani 1 2 d S . . 
O71 O -0.0533(7) 0.507(2) 0.7726(12) 0.074(8) Uiso 1 1 d . . . 
O72 O 0.2279(7) -0.002(2) 1.2333(12) 0.069(7) Uiso 1 1 d . . . 
K8 K 0.2500 0.2500 1.0000 0.28(3) Uani 1 2 d S . . 
O74 O 0.0595(11) -0.262(3) 0.6599(18) 0.125(14) Uiso 1 1 d . . . 
O75 O 0.2383(16) 0.198(4) 1.234(2) 0.16(2) Uiso 1 1 d . . . 
O76 O 0.2145(19) 0.221(5) 1.192(3) 0.20(3) Uiso 1 1 d . . . 
O77 O 0.1086(11) 0.521(3) 0.8208(17) 0.114(13) Uiso 1 1 d . . . 
O78 O 0.212(2) -0.115(6) 1.144(4) 0.26(4) Uiso 1 1 d . . . 
O79 O 0.272(2) 0.012(6) 1.172(3) 0.24(3) Uiso 1 1 d . . . 
O80 O 0.264(4) 0.141(11) 1.217(6) 0.39(8) Uiso 1 1 d . . . 
O81 O -0.043(3) 0.436(7) 0.941(4) 0.30(5) Uiso 1 1 d . . . 
K3 K 0.267(5) 0.406(10) 0.809(8) 0.72(16) Uani 0.63(3) 1 d P . 1 
K3 K 0.2815(4) 0.1007(14) 0.9733(7) 0.043(7) Uani 0.37(3) 1 d P . 2 
 
loop_ 
 _atom_site_aniso_label 
 _atom_site_aniso_U_11 
 _atom_site_aniso_U_22 
 _atom_site_aniso_U_33 
 _atom_site_aniso_U_23 
 _atom_site_aniso_U_13 
 _atom_site_aniso_U_12 
W1 0.0148(4) 0.0402(6) 0.0132(4) -0.0011(4) 0.0003(3) -0.0023(4) 
W2 0.0118(4) 0.0338(6) 0.0140(4) -0.0007(4) 0.0012(3) -0.0019(4) 
W3 0.0262(5) 0.0362(6) 0.0210(5) -0.0073(4) -0.0006(4) 0.0049(4) 
W4 0.0165(4) 0.0534(7) 0.0191(5) 0.0008(4) -0.0037(3) -0.0087(4) 
W5 0.0187(4) 0.0425(6) 0.0134(4) 0.0012(4) 0.0021(3) 0.0091(4) 
W6 0.0321(5) 0.0317(6) 0.0156(4) 0.0005(4) 0.0024(4) 0.0060(4) 
W7 0.0205(5) 0.0476(7) 0.0217(5) 0.0067(4) -0.0031(4) -0.0122(4) 
W8 0.0134(4) 0.0818(9) 0.0154(5) 0.0047(5) 0.0020(3) 0.0019(5) 
W9 0.0311(5) 0.0481(7) 0.0148(4) 0.0029(4) 0.0006(4) 0.0132(5) 
W10 0.0244(5) 0.0769(10) 0.0247(5) 0.0098(5) -0.0058(4) -0.0224(6) 
W11 0.0179(5) 0.0794(9) 0.0169(5) 0.0028(5) -0.0018(4) 0.0137(5) 
W12 0.0411(6) 0.0364(7) 0.0288(6) -0.0015(5) -0.0098(5) -0.0090(5) 
La1 0.0107(7) 0.0303(11) 0.0162(8) 0.000 -0.0004(6) 0.000 
W14 0.0339(5) 0.0294(6) 0.0255(5) -0.0015(4) -0.0061(4) 0.0002(4) 
W15 0.0125(4) 0.1140(13) 0.0197(5) 0.0064(6) 0.0004(4) -0.0033(6) 
W16 0.0304(6) 0.1203(14) 0.0227(6) -0.0038(7) -0.0009(4) 0.0421(8) 
W17 0.0607(8) 0.0671(10) 0.0212(5) -0.0017(5) -0.0015(5) 0.0435(7) 
W18 0.0357(6) 0.0883(11) 0.0189(5) -0.0038(6) 0.0016(4) 0.0370(7) 
P1 0.016(3) 0.056(5) 0.018(3) -0.001(3) 0.000(2) 0.013(3) 
P2 0.015(3) 0.049(4) 0.013(3) -0.003(3) -0.001(2) -0.006(3) 
K2 0.045(5) 0.146(11) 0.066(6) -0.010(6) 0.004(4) -0.012(6) 
K1 0.063(6) 0.129(11) 0.123(10) -0.049(8) 0.018(6) 0.017(7) 
K4 0.020(2) 0.053(4) 0.019(2) 0.001(2) -0.0013(19) -0.003(2) 
K5 0.030(3) 0.055(4) 0.025(3) -0.005(3) 0.005(2) 0.003(3) 
K6 0.140(14) 0.139(14) 0.135(13) -0.016(11) 0.032(11) 0.010(11) 
K7 0.34(7) 0.21(4) 0.31(6) 0.000 0.07(5) 0.000 
K8 0.16(3) 0.19(4) 0.47(8) -0.08(5) 0.03(4) -0.04(3) 
K3 0.7(3) 0.5(2) 1.0(4) -0.4(2) 0.5(3) -0.3(2) 
K3 0.018(8) 0.077(15) 0.027(9) 0.015(8) -0.006(6) -0.025(8) 
 
_geom_special_details 
; 
 All esds (except the esd in the dihedral angle between two l.s. planes) 
 are estimated using the full covariance matrix.  The cell esds are taken 
 into account individually in the estimation of esds in distances, angles 
 and torsion angles; correlations between esds in cell parameters are only 
 used when they are defined by crystal symmetry.  An approximate (isotropic) 
 treatment of cell esds is used for estimating esds involving l.s. planes. 
; 
 
loop_ 
 _geom_bond_atom_site_label_1 
 _geom_bond_atom_site_label_2 
 _geom_bond_distance 
 _geom_bond_site_symmetry_2 
 _geom_bond_publ_flag 
W1 O18 1.715(18) . ? 
W1 O35 1.823(16) . ? 
W1 O5 1.914(16) . ? 
W1 O13 1.971(17) . ? 
W1 O36 1.978(17) . ? 
W1 O31 2.359(16) . ? 
W1 K5 3.770(6) 6_556 ? 
W1 K6 4.029(18) . ? 
W1 K4 4.099(6) . ? 
W2 O17 1.733(16) . ? 
W2 O21 1.768(16) . ? 
W2 O11 1.910(16) . ? 
W2 O4 1.968(18) . ? 
W2 O35 2.079(15) . ? 
W2 O32 2.132(17) . ? 
W2 K4 3.605(5) 5_557 ? 
W2 K5 3.864(7) 2_556 ? 
W3 O1 1.734(19) . ? 
W3 O4 1.874(18) . ? 
W3 O5 1.922(16) . ? 
W3 O47 1.941(19) . ? 
W3 O45 1.948(19) . ? 
W3 O26 2.348(16) . ? 
W3 K5 3.721(6) 6_556 ? 
W3 K6 4.112(19) . ? 
W4 O52 1.73(2) . ? 
W4 O6 1.84(2) . ? 
W4 O37 1.876(19) . ? 
W4 O36 1.888(16) . ? 
W4 O14 1.952(19) . ? 
W4 O31 2.293(16) . ? 
W4 K3 3.732(16) 7_557 ? 
W4 K6 3.801(17) . ? 
W4 K2 3.885(10) . ? 
W4 K8 3.9921(13) . ? 
W5 O50 1.725(15) . ? 
W5 O61 1.759(15) . ? 
W5 O42 1.930(17) . ? 
W5 O41 1.941(17) . ? 
W5 O53 2.101(19) . ? 
W5 O28 2.379(16) . ? 
W5 K4 3.717(6) 6 ? 
W6 O16 1.71(2) . ? 
W6 O41 1.874(16) . ? 
W6 O11 1.886(16) . ? 
W6 O40 1.904(16) . ? 
W6 O54 1.939(18) . ? 
W6 O28 2.299(17) . ? 
W6 K5 3.828(6) 2_556 ? 
W6 K7 4.05(3) . ? 
W7 O19 1.722(19) . ? 
W7 O39 1.733(17) . ? 
W7 O8 1.940(19) . ? 
W7 O10 1.957(18) . ? 
W7 O38 2.060(19) . ? 
W7 O30 2.334(16) . ? 
W8 O49 1.70(2) . ? 
W8 O10 1.856(18) . ? 
W8 O42 1.868(17) . ? 
W8 O43 1.96(2) . ? 
W8 O23 1.99(2) . ? 
W8 O29 2.328(17) . ? 
W8 K4 3.595(5) 6 ? 
W9 O15 1.73(2) . ? 
W9 O13 1.835(18) . ? 
W9 O40 1.892(16) . ? 
W9 O33 1.925(19) . ? 
W9 O22 1.96(2) . ? 
W9 O27 2.334(18) . ? 
W10 O20 1.75(2) . ? 
W10 O38 1.821(18) . ? 
W10 O7 1.89(2) . ? 
W10 O37 1.931(19) . ? 
W10 O12 1.95(2) . ? 
W10 O30 2.396(17) . ? 
W10 K3 3.924(16) 7_557 ? 
W10 K2 4.050(10) 7_557 ? 
W11 O51 1.73(2) . ? 
W11 O14 1.871(19) . ? 
W11 O44 1.91(2) . ? 
W11 O33 1.913(19) . ? 
W11 O59 1.94(2) . ? 
W11 O27 2.382(17) . ? 
W11 K3 3.646(14) . ? 
W11 K2 3.945(11) . ? 
W11 K8 4.0750(16) . ? 
W12 O3 1.73(2) . ? 
W12 O46 1.81(2) . ? 
W12 O45 1.913(19) . ? 
W12 O7 1.94(2) . ? 
W12 O6 1.996(19) . ? 
W12 O26 2.423(17) . ? 
W12 K6 3.956(19) . ? 
La1 O61 2.445(16) . ? 
La1 O61 2.445(16) 2_556 ? 
La1 O21 2.471(16) 2_556 ? 
La1 O21 2.471(16) . ? 
La1 O9 2.480(19) . ? 
La1 O9 2.480(19) 2_556 ? 
La1 O39 2.506(16) . ? 
La1 O39 2.506(16) 2_556 ? 
W14 O2 1.74(2) . ? 
W14 O9 1.776(19) . ? 
W14 O8 1.902(19) . ? 
W14 O47 1.969(18) . ? 
W14 O46 2.11(2) . ? 
W14 O26 2.420(17) . ? 
W15 O48 1.76(2) . ? 
W15 O12 1.86(2) . ? 
W15 O44 1.88(2) . ? 
W15 O43 1.882(19) . ? 
W15 O60 1.96(2) . ? 
W15 O29 2.379(18) . ? 
W15 K3 3.826(14) . ? 
W15 K2 4.091(13) 7_557 ? 
W16 O34 1.71(3) . ? 
W16 O60 1.87(2) . ? 
W16 O55 1.88(2) . ? 
W16 O59 1.92(2) . ? 
W16 O56 1.94(2) . ? 
W16 O25 2.38(2) . ? 
W17 O58 1.78(3) . ? 
W17 O54 1.894(18) . ? 
W17 O22 1.894(19) . ? 
W17 O24 1.92(2) . ? 
W17 O56 1.94(2) . ? 
W17 O25 2.33(2) . ? 
W18 O57 1.73(2) . ? 
W18 O53 1.807(19) . ? 
W18 O23 1.86(2) . ? 
W18 O24 1.99(2) . ? 
W18 O55 2.02(2) . ? 
W18 O25 2.37(2) . ? 
P1 O28 1.539(17) . ? 
P1 O27 1.543(18) . ? 
P1 O29 1.56(2) . ? 
P1 O25 1.61(2) . ? 
P2 O32 1.511(18) . ? 
P2 O30 1.545(17) . ? 
P2 O31 1.546(17) . ? 
P2 O26 1.563(19) . ? 
O21 K4 2.915(17) 5_557 ? 
O17 K5 2.752(19) 2_556 ? 
O17 K4 2.784(17) 5_557 ? 
O16 K5 2.80(2) 2_556 ? 
O16 K1 3.32(2) 5_557 ? 
O5 K5 3.078(16) 6_556 ? 
O5 K6 3.11(2) . ? 
O50 K5 2.679(17) . ? 
O50 K4 3.083(17) 6 ? 
O41 K7 2.91(4) . ? 
O42 K4 2.807(17) 6 ? 
O11 K5 3.245(17) 2_556 ? 
O52 K2 2.70(2) . ? 
O52 K3 2.84(3) 7_557 ? 
O52 K8 3.38(2) . ? 
O18 K4 2.69(2) . ? 
O18 K5 2.908(19) 6_556 ? 
O14 K2 3.32(2) . ? 
O37 K3 3.15(3) 7_557 ? 
O37 K8 3.19(2) . ? 
O51 K3 2.76(2) . ? 
O51 K2 2.89(2) . ? 
O1 K5 2.88(2) 6_556 ? 
O1 K1 2.89(2) . ? 
O36 K6 3.02(2) . ? 
O45 K6 3.08(3) . ? 
O44 K3 3.02(3) . ? 
O44 K8 3.27(2) . ? 
O49 K4 2.86(2) 6 ? 
O15 K1 3.28(2) 5_557 ? 
O20 K2 2.81(3) 7_557 ? 
O20 K3 3.14(3) 7_557 ? 
O6 K6 2.92(3) . ? 
O48 K2 2.93(3) 7_557 ? 
O48 K3 3.12(3) . ? 
O57 K6 2.91(3) 6 ? 
K2 K3 2.19(18) 7_557 ? 
K2 O80 2.41(15) . ? 
K2 O76 2.64(8) . ? 
K2 O79 2.72(9) . ? 
K2 O20 2.81(3) 7_557 ? 
K2 O48 2.93(3) 7_557 ? 
K2 O75 3.01(6) . ? 
K2 O64 3.12(2) . ? 
K2 K8 3.379(12) . ? 
K1 O63 2.72(3) . ? 
K1 O81 2.85(11) . ? 
K1 O62 2.86(2) 5_557 ? 
K1 O15 3.28(2) 5_557 ? 
K1 O16 3.32(2) 5_557 ? 
K1 K4 4.092(13) 5_557 ? 
K1 K5 4.267(15) 6_556 ? 
K4 O62 2.75(2) . ? 
K4 O17 2.784(17) 5_557 ? 
K4 O42 2.807(17) 6_556 ? 
K4 O49 2.86(2) 6_556 ? 
K4 O21 2.915(17) 5_557 ? 
K4 O63 2.96(2) 5_557 ? 
K4 O50 3.083(17) 6_556 ? 
K4 W8 3.595(5) 6_556 ? 
K4 W2 3.605(5) 5_557 ? 
K4 W5 3.717(6) 6_556 ? 
K4 K1 4.092(13) 5_557 ? 
K5 O17 2.752(19) 2_556 ? 
K5 O74 2.77(5) . ? 
K5 O16 2.80(2) 2_556 ? 
K5 O1 2.88(2) 6 ? 
K5 O18 2.908(19) 6 ? 
K5 O63 3.04(2) 6 ? 
K5 O5 3.078(16) 6 ? 
K5 O11 3.245(17) 2_556 ? 
K5 W3 3.721(6) 6 ? 
K5 W1 3.770(6) 6 ? 
K5 W6 3.828(6) 2_556 ? 
K6 O74 2.74(5) 6_556 ? 
K6 O57 2.91(3) 6_556 ? 
K6 O65 3.41(3) . ? 
K6 K5 4.60(2) 6_556 ? 
O62 K1 2.86(2) 5_557 ? 
O63 K4 2.96(2) 5_557 ? 
O63 K5 3.04(2) 6_556 ? 
O64 K3 2.25(17) 7_557 ? 
O67 K7 3.08(5) . ? 
O68 K3 2.58(4) . ? 
K7 O41 2.91(4) 2_556 ? 
K7 O67 3.08(5) 2_556 ? 
K7 W6 4.05(3) 2_556 ? 
K7 K5 4.57(2) 2_556 ? 
O72 K3 1.87(18) 7_557 ? 
K8 K3 2.83(2) . ? 
K8 K3 2.83(2) 7_557 ? 
K8 O37 3.19(2) 7_557 ? 
K8 O44 3.27(2) 7_557 ? 
K8 O52 3.38(2) 7_557 ? 
K8 K2 3.379(12) 7_557 ? 
K8 W4 3.9921(13) 7_557 ? 
O74 K6 2.74(5) 6 ? 
O75 O76 1.28(8) . ? 
O75 O80 1.51(16) . ? 
O75 K3 1.94(14) 7_557 ? 
O76 K3 2.13(19) 7_557 ? 
O79 K3 2.19(18) 7_557 ? 
O80 K3 1.48(18) 7_557 ? 
K3 O80 1.48(18) 7_557 ? 
K3 O72 1.87(18) 7_557 ? 
K3 O75 1.94(14) 7_557 ? 
K3 O76 2.13(19) 7_557 ? 
K3 K2 2.19(18) 7_557 ? 
K3 O79 2.19(18) 7_557 ? 
K3 O64 2.25(17) 7_557 ? 
K3 O52 2.84(3) 7_557 ? 
K3 O20 3.14(3) 7_557 ? 
K3 O37 3.15(3) 7_557 ? 
K3 W4 3.732(16) 7_557 ? 
K3 W10 3.924(16) 7_557 ? 
 
loop_ 
 _geom_angle_atom_site_label_1 
 _geom_angle_atom_site_label_2 
 _geom_angle_atom_site_label_3 
 _geom_angle 
 _geom_angle_site_symmetry_1 
 _geom_angle_site_symmetry_3 
 _geom_angle_publ_flag 
O18 W1 O35 103.2(8) . . ? 
O18 W1 O5 96.8(8) . . ? 
O35 W1 O5 91.1(7) . . ? 
O18 W1 O13 96.8(8) . . ? 
O35 W1 O13 88.8(7) . . ? 
O5 W1 O13 166.1(7) . . ? 
O18 W1 O36 100.6(8) . . ? 
O35 W1 O36 156.1(7) . . ? 
O5 W1 O36 88.1(7) . . ? 
O13 W1 O36 86.4(7) . . ? 
O18 W1 O31 172.4(7) . . ? 
O35 W1 O31 84.3(6) . . ? 
O5 W1 O31 82.2(6) . . ? 
O13 W1 O31 83.9(6) . . ? 
O36 W1 O31 71.9(6) . . ? 
O18 W1 K5 47.7(6) . 6_556 ? 
O35 W1 K5 82.7(5) . 6_556 ? 
O5 W1 K5 54.4(5) . 6_556 ? 
O13 W1 K5 139.2(5) . 6_556 ? 
O36 W1 K5 115.5(5) . 6_556 ? 
O31 W1 K5 134.2(4) . 6_556 ? 
O18 W1 K6 82.9(7) . . ? 
O35 W1 K6 139.5(6) . . ? 
O5 W1 K6 48.4(5) . . ? 
O13 W1 K6 130.8(6) . . ? 
O36 W1 K6 46.1(6) . . ? 
O31 W1 K6 90.9(5) . . ? 
K5 W1 K6 72.1(3) 6_556 . ? 
O18 W1 K4 27.1(6) . . ? 
O35 W1 K4 85.7(5) . . ? 
O5 W1 K4 118.1(5) . . ? 
O13 W1 K4 75.8(5) . . ? 
O36 W1 K4 115.5(5) . . ? 
O31 W1 K4 157.5(4) . . ? 
K5 W1 K4 63.93(13) 6_556 . ? 
K6 W1 K4 109.6(3) . . ? 
O17 W2 O21 98.9(8) . . ? 
O17 W2 O11 95.0(7) . . ? 
O21 W2 O11 99.8(7) . . ? 
O17 W2 O4 93.4(7) . . ? 
O21 W2 O4 93.1(7) . . ? 
O11 W2 O4 163.3(7) . . ? 
O17 W2 O35 90.2(7) . . ? 
O21 W2 O35 169.8(7) . . ? 
O11 W2 O35 83.7(6) . . ? 
O4 W2 O35 81.9(7) . . ? 
O17 W2 O32 170.3(7) . . ? 
O21 W2 O32 90.4(7) . . ? 
O11 W2 O32 85.7(7) . . ? 
O4 W2 O32 83.6(7) . . ? 
O35 W2 O32 80.3(6) . . ? 
O17 W2 K4 48.7(6) . 5_557 ? 
O21 W2 K4 53.2(5) . 5_557 ? 
O11 W2 K4 115.6(5) . 5_557 ? 
O4 W2 K4 80.7(5) . 5_557 ? 
O35 W2 K4 133.7(4) . 5_557 ? 
O32 W2 K4 139.1(5) . 5_557 ? 
O17 W2 K5 39.3(6) . 2_556 ? 
O21 W2 K5 95.2(6) . 2_556 ? 
O11 W2 K5 57.0(5) . 2_556 ? 
O4 W2 K5 132.7(5) . 2_556 ? 
O35 W2 K5 94.8(5) . 2_556 ? 
O32 W2 K5 142.6(5) . 2_556 ? 
K4 W2 K5 67.87(14) 5_557 2_556 ? 
O1 W3 O4 101.7(8) . . ? 
O1 W3 O5 99.1(8) . . ? 
O4 W3 O5 87.5(7) . . ? 
O1 W3 O47 100.6(8) . . ? 
O4 W3 O47 91.8(8) . . ? 
O5 W3 O47 160.0(7) . . ? 
O1 W3 O45 100.9(9) . . ? 
O4 W3 O45 157.2(8) . . ? 
O5 W3 O45 86.1(7) . . ? 
O47 W3 O45 86.9(8) . . ? 
O1 W3 O26 173.3(8) . . ? 
O4 W3 O26 83.0(7) . . ? 
O5 W3 O26 85.8(6) . . ? 
O47 W3 O26 74.3(7) . . ? 
O45 W3 O26 74.8(7) . . ? 
O1 W3 K5 48.3(7) . 6_556 ? 
O4 W3 K5 79.7(5) . 6_556 ? 
O5 W3 K5 55.7(5) . 6_556 ? 
O47 W3 K5 143.8(6) . 6_556 ? 
O45 W3 K5 113.9(6) . 6_556 ? 
O26 W3 K5 138.0(4) . 6_556 ? 
O1 W3 K6 85.8(7) . . ? 
O4 W3 K6 133.6(6) . . ? 
O5 W3 K6 46.2(5) . . ? 
O47 W3 K6 132.2(6) . . ? 
O45 W3 K6 45.7(6) . . ? 
O26 W3 K6 94.5(5) . . ? 
K5 W3 K6 71.6(3) 6_556 . ? 
O52 W4 O6 98.4(9) . . ? 
O52 W4 O37 100.0(9) . . ? 
O6 W4 O37 87.7(8) . . ? 
O52 W4 O36 99.5(8) . . ? 
O6 W4 O36 91.0(8) . . ? 
O37 W4 O36 160.5(8) . . ? 
O52 W4 O14 94.9(9) . . ? 
O6 W4 O14 166.7(8) . . ? 
O37 W4 O14 89.3(8) . . ? 
O36 W4 O14 87.5(7) . . ? 
O52 W4 O31 174.4(8) . . ? 
O6 W4 O31 83.2(7) . . ? 
O37 W4 O31 85.5(7) . . ? 
O36 W4 O31 75.0(6) . . ? 
O14 W4 O31 83.7(7) . . ? 
O52 W4 K3 46.9(7) . 7_557 ? 
O6 W4 K3 78.1(7) . 7_557 ? 
O37 W4 K3 57.5(7) . 7_557 ? 
O36 W4 K3 141.0(6) . 7_557 ? 
O14 W4 K3 110.9(6) . 7_557 ? 
O31 W4 K3 138.7(5) . 7_557 ? 
O52 W4 K6 79.4(7) . . ? 
O6 W4 K6 48.4(6) . . ? 
O37 W4 K6 134.6(7) . . ? 
O36 W4 K6 51.6(6) . . ? 
O14 W4 K6 136.1(6) . . ? 
O31 W4 K6 97.9(5) . . ? 
K3 W4 K6 96.6(4) 7_557 . ? 
O52 W4 K2 36.5(7) . . ? 
O6 W4 K2 134.6(6) . . ? 
O37 W4 K2 102.1(6) . . ? 
O36 W4 K2 92.6(5) . . ? 
O14 W4 K2 58.6(6) . . ? 
O31 W4 K2 141.1(5) . . ? 
K3 W4 K2 71.0(3) 7_557 . ? 
K6 W4 K2 102.8(3) . . ? 
O52 W4 K8 56.9(7) . . ? 
O6 W4 K8 118.7(6) . . ? 
O37 W4 K8 51.6(6) . . ? 
O36 W4 K8 142.7(5) . . ? 
O14 W4 K8 68.4(5) . . ? 
O31 W4 K8 127.0(4) . . ? 
K3 W4 K8 42.9(3) 7_557 . ? 
K6 W4 K8 133.6(3) . . ? 
K2 W4 K8 50.78(17) . . ? 
O50 W5 O61 102.4(7) . . ? 
O50 W5 O42 100.5(7) . . ? 
O61 W5 O42 95.2(7) . . ? 
O50 W5 O41 101.9(7) . . ? 
O61 W5 O41 94.5(7) . . ? 
O42 W5 O41 153.0(7) . . ? 
O50 W5 O53 92.0(7) . . ? 
O61 W5 O53 165.6(7) . . ? 
O42 W5 O53 81.2(7) . . ? 
O41 W5 O53 83.2(7) . . ? 
O50 W5 O28 168.8(7) . . ? 
O61 W5 O28 87.5(6) . . ? 
O42 W5 O28 83.5(6) . . ? 
O41 W5 O28 71.8(6) . . ? 
O53 W5 O28 78.2(6) . . ? 
O50 W5 K4 55.4(5) . 6 ? 
O61 W5 K4 90.3(5) . 6 ? 
O42 W5 K4 47.7(5) . 6 ? 
O41 W5 K4 157.3(5) . 6 ? 
O53 W5 K4 97.4(5) . 6 ? 
O28 W5 K4 130.7(4) . 6 ? 
O16 W6 O41 99.6(8) . . ? 
O16 W6 O11 99.8(8) . . ? 
O41 W6 O11 93.5(7) . . ? 
O16 W6 O40 101.3(8) . . ? 
O41 W6 O40 158.2(7) . . ? 
O11 W6 O40 88.9(7) . . ? 
O16 W6 O54 95.9(9) . . ? 
O41 W6 O54 88.3(7) . . ? 
O11 W6 O54 163.6(7) . . ? 
O40 W6 O54 83.5(7) . . ? 
O16 W6 O28 174.0(8) . . ? 
O41 W6 O28 74.8(6) . . ? 
O11 W6 O28 82.9(6) . . ? 
O40 W6 O28 84.0(7) . . ? 
O54 W6 O28 81.8(7) . . ? 
O16 W6 K5 42.0(7) . 2_556 ? 
O41 W6 K5 100.4(5) . 2_556 ? 
O11 W6 K5 57.9(5) . 2_556 ? 
O40 W6 K5 99.3(5) . 2_556 ? 
O54 W6 K5 137.8(6) . 2_556 ? 
O28 W6 K5 140.4(4) . 2_556 ? 
O16 W6 K7 58.4(8) . . ? 
O41 W6 K7 41.2(7) . . ? 
O11 W6 K7 100.9(7) . . ? 
O40 W6 K7 158.6(8) . . ? 
O54 W6 K7 91.3(7) . . ? 
O28 W6 K7 115.9(6) . . ? 
K5 W6 K7 70.94(12) 2_556 . ? 
O19 W7 O39 103.3(8) . . ? 
O19 W7 O8 97.6(9) . . ? 
O39 W7 O8 93.9(8) . . ? 
O19 W7 O10 97.0(8) . . ? 
O39 W7 O10 93.2(8) . . ? 
O8 W7 O10 161.9(7) . . ? 
O19 W7 O38 93.5(8) . . ? 
O39 W7 O38 163.1(8) . . ? 
O8 W7 O38 85.5(8) . . ? 
O10 W7 O38 82.8(7) . . ? 
O19 W7 O30 163.5(8) . . ? 
O39 W7 O30 93.1(7) . . ? 
O8 W7 O30 81.8(7) . . ? 
O10 W7 O30 81.1(6) . . ? 
O38 W7 O30 70.0(7) . . ? 
O49 W8 O10 99.2(9) . . ? 
O49 W8 O42 100.6(9) . . ? 
O10 W8 O42 90.3(8) . . ? 
O49 W8 O43 100.0(9) . . ? 
O10 W8 O43 92.1(8) . . ? 
O42 W8 O43 158.6(8) . . ? 
O49 W8 O23 95.7(9) . . ? 
O10 W8 O23 165.1(8) . . ? 
O42 W8 O23 87.0(8) . . ? 
O43 W8 O23 85.3(8) . . ? 
O49 W8 O29 173.3(8) . . ? 
O10 W8 O29 82.7(7) . . ? 
O42 W8 O29 85.9(7) . . ? 
O43 W8 O29 73.4(7) . . ? 
O23 W8 O29 82.5(7) . . ? 
O49 W8 K4 51.4(7) . 6 ? 
O10 W8 K4 87.7(5) . 6 ? 
O42 W8 K4 50.6(5) . 6 ? 
O43 W8 K4 150.8(6) . 6 ? 
O23 W8 K4 101.7(6) . 6 ? 
O29 W8 K4 135.4(4) . 6 ? 
O15 W9 O13 99.1(9) . . ? 
O15 W9 O40 101.8(9) . . ? 
O13 W9 O40 91.8(7) . . ? 
O15 W9 O33 100.7(9) . . ? 
O13 W9 O33 89.5(8) . . ? 
O40 W9 O33 157.0(8) . . ? 
O15 W9 O22 96.0(9) . . ? 
O13 W9 O22 164.9(8) . . ? 
O40 W9 O22 84.8(8) . . ? 
O33 W9 O22 88.0(8) . . ? 
O15 W9 O27 174.8(8) . . ? 
O13 W9 O27 83.7(7) . . ? 
O40 W9 O27 82.5(7) . . ? 
O33 W9 O27 74.8(7) . . ? 
O22 W9 O27 81.3(7) . . ? 
O20 W10 O38 102.3(10) . . ? 
O20 W10 O7 97.1(10) . . ? 
O38 W10 O7 92.9(9) . . ? 
O20 W10 O37 100.1(10) . . ? 
O38 W10 O37 157.6(9) . . ? 
O7 W10 O37 83.2(9) . . ? 
O20 W10 O12 96.4(10) . . ? 
O38 W10 O12 89.9(8) . . ? 
O7 W10 O12 165.3(9) . . ? 
O37 W10 O12 88.7(8) . . ? 
O20 W10 O30 174.6(9) . . ? 
O38 W10 O30 72.2(7) . . ? 
O7 W10 O30 83.0(8) . . ? 
O37 W10 O30 85.3(7) . . ? 
O12 W10 O30 84.1(7) . . ? 
O20 W10 K3 51.3(8) . 7_557 ? 
O38 W10 K3 147.0(7) . 7_557 ? 
O7 W10 K3 74.1(7) . 7_557 ? 
O37 W10 K3 52.6(7) . 7_557 ? 
O12 W10 K3 110.4(7) . 7_557 ? 
O30 W10 K3 133.5(4) . 7_557 ? 
O20 W10 K2 35.1(8) . 7_557 ? 
O38 W10 K2 104.2(6) . 7_557 ? 
O7 W10 K2 131.2(7) . 7_557 ? 
O37 W10 K2 94.9(6) . 7_557 ? 
O12 W10 K2 61.5(6) . 7_557 ? 
O30 W10 K2 145.6(4) . 7_557 ? 
K3 W10 K2 66.9(3) 7_557 7_557 ? 
O51 W11 O14 98.3(9) . . ? 
O51 W11 O44 100.7(9) . . ? 
O14 W11 O44 90.3(9) . . ? 
O51 W11 O33 99.8(9) . . ? 
O14 W11 O33 90.7(8) . . ? 
O44 W11 O33 159.1(9) . . ? 
O51 W11 O59 97.3(9) . . ? 
O14 W11 O59 164.1(8) . . ? 
O44 W11 O59 84.1(9) . . ? 
O33 W11 O59 89.4(9) . . ? 
O51 W11 O27 173.7(8) . . ? 
O14 W11 O27 82.8(7) . . ? 
O44 W11 O27 85.5(8) . . ? 
O33 W11 O27 73.9(7) . . ? 
O59 W11 O27 82.0(8) . . ? 
O51 W11 K3 46.8(7) . . ? 
O14 W11 K3 108.7(7) . . ? 
O44 W11 K3 55.9(7) . . ? 
O33 W11 K3 142.3(6) . . ? 
O59 W11 K3 80.3(7) . . ? 
O27 W11 K3 138.8(5) . . ? 
O51 W11 K2 41.5(7) . . ? 
O14 W11 K2 56.9(6) . . ? 
O44 W11 K2 101.9(7) . . ? 
O33 W11 K2 96.1(6) . . ? 
O59 W11 K2 138.8(6) . . ? 
O27 W11 K2 138.7(5) . . ? 
K3 W11 K2 70.6(3) . . ? 
O51 W11 K8 60.7(7) . . ? 
O14 W11 K8 66.5(6) . . ? 
O44 W11 K8 52.2(7) . . ? 
O33 W11 K8 145.3(6) . . ? 
O59 W11 K8 119.8(6) . . ? 
O27 W11 K8 125.1(4) . . ? 
K3 W11 K8 42.6(4) . . ? 
K2 W11 K8 49.80(19) . . ? 
O3 W12 O46 102.7(10) . . ? 
O3 W12 O45 101.5(10) . . ? 
O46 W12 O45 90.4(9) . . ? 
O3 W12 O7 100.9(10) . . ? 
O46 W12 O7 92.1(9) . . ? 
O45 W12 O7 156.3(9) . . ? 
O3 W12 O6 99.6(10) . . ? 
O46 W12 O6 157.7(9) . . ? 
O45 W12 O6 85.8(8) . . ? 
O7 W12 O6 83.1(8) . . ? 
O3 W12 O26 174.0(9) . . ? 
O46 W12 O26 74.4(8) . . ? 
O45 W12 O26 73.5(7) . . ? 
O7 W12 O26 84.5(7) . . ? 
O6 W12 O26 83.5(7) . . ? 
O3 W12 K6 81.6(8) . . ? 
O46 W12 K6 139.3(7) . . ? 
O45 W12 K6 49.7(6) . . ? 
O7 W12 K6 127.3(7) . . ? 
O6 W12 K6 45.4(6) . . ? 
O26 W12 K6 97.2(5) . . ? 
O61 La1 O61 78.0(7) . 2_556 ? 
O61 La1 O21 72.7(5) . 2_556 ? 
O61 La1 O21 73.6(5) 2_556 2_556 ? 
O61 La1 O21 73.6(5) . . ? 
O61 La1 O21 72.7(5) 2_556 . ? 
O21 La1 O21 136.2(8) 2_556 . ? 
O61 La1 O9 114.4(6) . . ? 
O61 La1 O9 137.4(5) 2_556 . ? 
O21 La1 O9 148.2(6) 2_556 . ? 
O21 La1 O9 72.6(6) . . ? 
O61 La1 O9 137.4(5) . 2_556 ? 
O61 La1 O9 114.4(6) 2_556 2_556 ? 
O21 La1 O9 72.6(6) 2_556 2_556 ? 
O21 La1 O9 148.2(6) . 2_556 ? 
O9 La1 O9 84.6(8) . 2_556 ? 
O61 La1 O39 69.7(5) . . ? 
O61 La1 O39 145.3(5) 2_556 . ? 
O21 La1 O39 84.9(5) 2_556 . ? 
O21 La1 O39 108.5(5) . . ? 
O9 La1 O39 70.4(6) . . ? 
O9 La1 O39 83.3(6) 2_556 . ? 
O61 La1 O39 145.3(5) . 2_556 ? 
O61 La1 O39 69.7(5) 2_556 2_556 ? 
O21 La1 O39 108.5(5) 2_556 2_556 ? 
O21 La1 O39 84.9(5) . 2_556 ? 
O9 La1 O39 83.3(6) . 2_556 ? 
O9 La1 O39 70.4(6) 2_556 2_556 ? 
O39 La1 O39 144.4(8) . 2_556 ? 
O2 W14 O9 103.2(9) . . ? 
O2 W14 O8 102.4(9) . . ? 
O9 W14 O8 94.3(8) . . ? 
O2 W14 O47 100.4(9) . . ? 
O9 W14 O47 92.6(8) . . ? 
O8 W14 O47 153.9(8) . . ? 
O2 W14 O46 94.3(9) . . ? 
O9 W14 O46 162.2(8) . . ? 
O8 W14 O46 84.9(8) . . ? 
O47 W14 O46 81.0(8) . . ? 
O2 W14 O26 163.1(8) . . ? 
O9 W14 O26 92.5(7) . . ? 
O8 W14 O26 82.5(7) . . ? 
O47 W14 O26 72.1(7) . . ? 
O46 W14 O26 69.8(7) . . ? 
O48 W15 O12 98.3(10) . . ? 
O48 W15 O44 102.3(10) . . ? 
O12 W15 O44 91.8(9) . . ? 
O48 W15 O43 99.1(9) . . ? 
O12 W15 O43 89.1(9) . . ? 
O44 W15 O43 158.2(9) . . ? 
O48 W15 O60 98.5(10) . . ? 
O12 W15 O60 163.2(9) . . ? 
O44 W15 O60 84.8(9) . . ? 
O43 W15 O60 88.1(9) . . ? 
O48 W15 O29 172.5(8) . . ? 
O12 W15 O29 81.3(8) . . ? 
O44 W15 O29 85.2(8) . . ? 
O43 W15 O29 73.4(7) . . ? 
O60 W15 O29 82.1(8) . . ? 
O48 W15 K3 53.4(8) . . ? 
O12 W15 K3 110.5(7) . . ? 
O44 W15 K3 51.1(7) . . ? 
O43 W15 K3 147.2(7) . . ? 
O60 W15 K3 79.9(7) . . ? 
O29 W15 K3 133.8(5) . . ? 
O48 W15 K2 38.4(8) . 7_557 ? 
O12 W15 K2 60.4(7) . 7_557 ? 
O44 W15 K2 96.3(7) . 7_557 ? 
O43 W15 K2 103.0(6) . 7_557 ? 
O60 W15 K2 136.3(7) . 7_557 ? 
O29 W15 K2 141.6(5) . 7_557 ? 
K3 W15 K2 67.9(3) . 7_557 ? 
O34 W16 O60 104.7(11) . . ? 
O34 W16 O55 100.3(11) . . ? 
O60 W16 O55 90.1(9) . . ? 
O34 W16 O59 102.2(11) . . ? 
O60 W16 O59 85.8(9) . . ? 
O55 W16 O59 157.5(9) . . ? 
O34 W16 O56 98.0(11) . . ? 
O60 W16 O56 157.2(9) . . ? 
O55 W16 O56 88.5(9) . . ? 
O59 W16 O56 86.8(9) . . ? 
O34 W16 O25 169.0(10) . . ? 
O60 W16 O25 84.7(8) . . ? 
O55 W16 O25 73.5(8) . . ? 
O59 W16 O25 84.0(8) . . ? 
O56 W16 O25 73.1(9) . . ? 
O58 W17 O54 102.7(10) . . ? 
O58 W17 O22 102.5(10) . . ? 
O54 W17 O22 85.2(8) . . ? 
O58 W17 O24 98.9(11) . . ? 
O54 W17 O24 90.7(8) . . ? 
O22 W17 O24 158.5(9) . . ? 
O58 W17 O56 99.4(11) . . ? 
O54 W17 O56 157.8(9) . . ? 
O22 W17 O56 88.1(9) . . ? 
O24 W17 O56 87.8(9) . . ? 
O58 W17 O25 170.3(10) . . ? 
O54 W17 O25 84.0(8) . . ? 
O22 W17 O25 84.9(8) . . ? 
O24 W17 O25 73.7(9) . . ? 
O56 W17 O25 74.4(9) . . ? 
O57 W18 O53 105.8(10) . . ? 
O57 W18 O23 103.9(10) . . ? 
O53 W18 O23 91.8(9) . . ? 
O57 W18 O24 97.7(10) . . ? 
O53 W18 O24 90.4(9) . . ? 
O23 W18 O24 156.8(9) . . ? 
O57 W18 O55 96.3(10) . . ? 
O53 W18 O55 157.5(8) . . ? 
O23 W18 O55 86.9(9) . . ? 
O24 W18 O55 82.3(9) . . ? 
O57 W18 O25 164.4(10) . . ? 
O53 W18 O25 85.9(8) . . ? 
O23 W18 O25 85.5(8) . . ? 
O24 W18 O25 71.6(8) . . ? 
O55 W18 O25 71.6(8) . . ? 
O28 P1 O27 111.4(10) . . ? 
O28 P1 O29 111.7(10) . . ? 
O27 P1 O29 110.9(11) . . ? 
O28 P1 O25 106.9(11) . . ? 
O27 P1 O25 107.3(10) . . ? 
O29 P1 O25 108.4(10) . . ? 
O32 P2 O30 113.3(9) . . ? 
O32 P2 O31 111.2(10) . . ? 
O30 P2 O31 110.7(9) . . ? 
O32 P2 O26 108.0(10) . . ? 
O30 P2 O26 105.8(10) . . ? 
O31 P2 O26 107.6(9) . . ? 
W2 O21 La1 137.1(8) . . ? 
W2 O21 K4 97.7(6) . 5_557 ? 
La1 O21 K4 124.8(6) . 5_557 ? 
W1 O35 W2 149.1(9) . . ? 
W7 O39 La1 156.7(9) . . ? 
W2 O17 K5 117.2(8) . 2_556 ? 
W2 O17 K4 103.4(7) . 5_557 ? 
K5 O17 K4 97.9(5) 2_556 5_557 ? 
W6 O16 K5 113.9(9) . 2_556 ? 
W6 O16 K1 114.9(9) . 5_557 ? 
K5 O16 K1 88.0(5) 2_556 5_557 ? 
W15 O43 W8 121.9(10) . . ? 
W1 O5 W3 146.3(9) . . ? 
W1 O5 K5 95.3(6) . 6_556 ? 
W3 O5 K5 93.3(6) . 6_556 ? 
W1 O5 K6 104.1(7) . . ? 
W3 O5 K6 107.3(7) . . ? 
K5 O5 K6 95.9(6) 6_556 . ? 
W14 O9 La1 156.0(10) . . ? 
W5 O50 K5 163.3(9) . . ? 
W5 O50 K4 97.2(7) . 6 ? 
K5 O50 K4 92.6(5) . 6 ? 
W9 O40 W6 154.3(10) . . ? 
W6 O41 W5 121.0(9) . . ? 
W6 O41 K7 113.7(8) . . ? 
W5 O41 K7 124.6(8) . . ? 
W14 O8 W7 143.2(11) . . ? 
W8 O42 W5 155.9(10) . . ? 
W8 O42 K4 98.5(7) . 6 ? 
W5 O42 K4 101.8(7) . 6 ? 
P2 O32 W2 136.0(10) . . ? 
W6 O11 W2 166.2(9) . . ? 
W6 O11 K5 92.7(6) . 2_556 ? 
W2 O11 K5 93.5(6) . 2_556 ? 
W4 O52 K2 121.1(10) . . ? 
W4 O52 K3 106.8(9) . 7_557 ? 
K2 O52 K3 105.9(8) . 7_557 ? 
W4 O52 K8 97.7(8) . . ? 
K2 O52 K8 66.5(5) . . ? 
K3 O52 K8 53.4(5) 7_557 . ? 
W1 O18 K4 136.0(9) . . ? 
W1 O18 K5 106.4(8) . 6_556 ? 
K4 O18 K5 96.4(6) . 6_556 ? 
W11 O14 W4 161.5(11) . . ? 
W11 O14 K2 94.9(7) . . ? 
W4 O14 K2 91.2(7) . . ? 
W12 O46 W14 124.2(11) . . ? 
W3 O47 W14 121.8(10) . . ? 
W3 O4 W2 153.1(10) . . ? 
W4 O37 W10 150.5(11) . . ? 
W4 O37 K3 92.3(8) . 7_557 ? 
W10 O37 K3 98.2(8) . 7_557 ? 
W4 O37 K8 101.0(7) . . ? 
W10 O37 K8 107.4(8) . . ? 
K3 O37 K8 53.1(5) 7_557 . ? 
W11 O51 K3 106.1(9) . . ? 
W11 O51 K2 115.1(9) . . ? 
K3 O51 K2 102.0(8) . . ? 
P2 O26 W3 123.7(10) . . ? 
P2 O26 W14 125.0(9) . . ? 
W3 O26 W14 91.5(6) . . ? 
P2 O26 W12 124.9(9) . . ? 
W3 O26 W12 89.9(6) . . ? 
W14 O26 W12 91.7(6) . . ? 
W18 O53 W5 149.8(11) . . ? 
W3 O1 K5 104.9(9) . 6_556 ? 
W3 O1 K1 125.6(9) . . ? 
K5 O1 K1 95.4(7) 6_556 . ? 
W11 O33 W9 120.9(10) . . ? 
W9 O13 W1 158.1(10) . . ? 
W4 O36 W1 120.6(8) . . ? 
W4 O36 K6 99.0(8) . . ? 
W1 O36 K6 105.6(7) . . ? 
W12 O45 W3 121.6(10) . . ? 
W12 O45 K6 102.1(8) . . ? 
W3 O45 K6 107.4(8) . . ? 
W15 O44 W11 153.0(13) . . ? 
W15 O44 K3 100.0(9) . . ? 
W11 O44 K3 92.6(8) . . ? 
W15 O44 K8 106.3(9) . . ? 
W11 O44 K8 100.4(8) . . ? 
K3 O44 K8 53.3(6) . . ? 
W8 O49 K4 100.9(9) . 6 ? 
P1 O29 W8 127.1(10) . . ? 
P1 O29 W15 127.2(10) . . ? 
W8 O29 W15 91.0(6) . . ? 
W9 O15 K1 114.7(9) . 5_557 ? 
W17 O54 W6 152.6(11) . . ? 
P1 O27 W9 128.9(11) . . ? 
P1 O27 W11 127.4(10) . . ? 
W9 O27 W11 90.1(6) . . ? 
W10 O20 K2 123.9(12) . 7_557 ? 
W10 O20 K3 102.9(10) . 7_557 ? 
K2 O20 K3 95.1(8) 7_557 7_557 ? 
W10 O38 W7 124.5(10) . . ? 
W15 O12 W10 161.2(12) . . ? 
W4 O6 W12 149.7(11) . . ? 
W4 O6 K6 103.6(9) . . ? 
W12 O6 K6 105.6(8) . . ? 
W18 O23 W8 145.0(11) . . ? 
P1 O28 W6 128.6(10) . . ? 
P1 O28 W5 130.2(9) . . ? 
W6 O28 W5 90.4(6) . . ? 
W17 O22 W9 150.6(11) . . ? 
W17 O24 W18 121.4(12) . . ? 
P2 O30 W7 127.3(9) . . ? 
P2 O30 W10 127.3(9) . . ? 
W7 O30 W10 93.2(6) . . ? 
W15 O48 K2 119.7(11) . 7_557 ? 
W15 O48 K3 99.7(9) . . ? 
K2 O48 K3 94.1(8) 7_557 . ? 
P2 O31 W4 130.9(10) . . ? 
P2 O31 W1 124.1(9) . . ? 
W4 O31 W1 92.4(6) . . ? 
W10 O7 W12 153.6(12) . . ? 
P1 O25 W17 124.5(11) . . ? 
P1 O25 W18 122.0(11) . . ? 
W17 O25 W18 93.2(7) . . ? 
P1 O25 W16 124.4(11) . . ? 
W17 O25 W16 91.5(7) . . ? 
W18 O25 W16 92.3(7) . . ? 
W16 O59 W11 151.0(12) . . ? 
W16 O55 W18 122.5(11) . . ? 
W18 O57 K6 139.0(12) . 6 ? 
W17 O56 W16 121.0(12) . . ? 
W16 O60 W15 151.5(12) . . ? 
W8 O10 W7 158.0(10) . . ? 
K3 K2 O80 37(4) 7_557 . ? 
K3 K2 O76 51(5) 7_557 . ? 
O80 K2 O76 55(4) . . ? 
K3 K2 O52 108(5) 7_557 . ? 
O80 K2 O52 122(4) . . ? 
O76 K2 O52 67.6(19) . . ? 
K3 K2 O79 52(5) 7_557 . ? 
O80 K2 O79 55(5) . . ? 
O76 K2 O79 101(3) . . ? 
O52 K2 O79 153(2) . . ? 
K3 K2 O20 113(5) 7_557 7_557 ? 
O80 K2 O20 92(4) . 7_557 ? 
O76 K2 O20 142.4(19) . 7_557 ? 
O52 K2 O20 138.7(8) . 7_557 ? 
O79 K2 O20 64.6(19) . 7_557 ? 
K3 K2 O51 109(3) 7_557 . ? 
O80 K2 O51 130(4) . . ? 
O76 K2 O51 146.1(18) . . ? 
O52 K2 O51 100.9(7) . . ? 
O79 K2 O51 74.9(19) . . ? 
O20 K2 O51 67.0(7) 7_557 . ? 
K3 K2 O48 109(3) 7_557 7_557 ? 
O80 K2 O48 83(4) . 7_557 ? 
O76 K2 O48 64.8(18) . 7_557 ? 
O52 K2 O48 67.0(7) . 7_557 ? 
O79 K2 O48 131.6(19) . 7_557 ? 
O20 K2 O48 97.8(7) 7_557 7_557 ? 
O51 K2 O48 142.2(7) . 7_557 ? 
K3 K2 O75 40(4) 7_557 . ? 
O80 K2 O75 30(4) . . ? 
O76 K2 O75 25.2(17) . . ? 
O52 K2 O75 92.3(14) . . ? 
O79 K2 O75 81(2) . . ? 
O20 K2 O75 118.8(14) 7_557 . ? 
O51 K2 O75 149.0(14) . . ? 
O48 K2 O75 68.8(13) 7_557 . ? 
K3 K2 O64 46(4) 7_557 . ? 
O80 K2 O64 83(4) . . ? 
O76 K2 O64 66.2(18) . . ? 
O52 K2 O64 79.0(6) . . ? 
O79 K2 O64 74.4(19) . . ? 
O20 K2 O64 132.5(8) 7_557 . ? 
O51 K2 O64 80.5(6) . . ? 
O48 K2 O64 127.9(7) 7_557 . ? 
O75 K2 O64 74.6(12) . . ? 
K3 K2 O14 105(4) 7_557 . ? 
O80 K2 O14 142(4) . . ? 
O76 K2 O14 102.6(18) . . ? 
O52 K2 O14 52.4(6) . . ? 
O79 K2 O14 111.3(19) . . ? 
O20 K2 O14 115.0(7) 7_557 . ? 
O51 K2 O14 51.5(5) . . ? 
O48 K2 O14 116.9(7) 7_557 . ? 
O75 K2 O14 124.4(13) . . ? 
O64 K2 O14 59.0(5) . . ? 
K3 K2 K8 173(5) 7_557 . ? 
O80 K2 K8 149(4) . . ? 
O76 K2 K8 126.8(18) . . ? 
O52 K2 K8 66.4(5) . . ? 
O79 K2 K8 131.9(19) . . ? 
O20 K2 K8 72.6(5) 7_557 . ? 
O51 K2 K8 68.8(5) . . ? 
O48 K2 K8 73.7(5) 7_557 . ? 
O75 K2 K8 141.8(13) . . ? 
O64 K2 K8 126.9(5) . . ? 
O14 K2 K8 68.0(4) . . ? 
O63 K1 O81 136(2) . . ? 
O63 K1 O62 80.1(7) . 5_557 ? 
O81 K1 O62 67(2) . 5_557 ? 
O63 K1 O1 76.2(7) . . ? 
O81 K1 O1 72(2) . . ? 
O62 K1 O1 83.7(7) 5_557 . ? 
O63 K1 O15 74.0(7) . 5_557 ? 
O81 K1 O15 133(2) . 5_557 ? 
O62 K1 O15 92.0(7) 5_557 5_557 ? 
O1 K1 O15 150.2(7) . 5_557 ? 
O63 K1 O16 65.3(6) . 5_557 ? 
O81 K1 O16 130(2) . 5_557 ? 
O62 K1 O16 142.1(7) 5_557 5_557 ? 
O1 K1 O16 73.6(6) . 5_557 ? 
O15 K1 O16 93.1(6) 5_557 5_557 ? 
O63 K1 K4 46.2(5) . 5_557 ? 
O81 K1 K4 109(2) . 5_557 ? 
O62 K1 K4 42.1(5) 5_557 5_557 ? 
O1 K1 K4 97.4(5) . 5_557 ? 
O15 K1 K4 61.9(4) 5_557 5_557 ? 
O16 K1 K4 110.6(5) 5_557 5_557 ? 
O63 K1 K5 45.1(5) . 6_556 ? 
O81 K1 K5 114(2) . 6_556 ? 
O62 K1 K5 102.9(5) 5_557 6_556 ? 
O1 K1 K5 42.1(4) . 6_556 ? 
O15 K1 K5 111.5(6) 5_557 6_556 ? 
O16 K1 K5 41.0(4) 5_557 6_556 ? 
K4 K1 K5 87.0(3) 5_557 6_556 ? 
W5 O61 La1 153.0(8) . . ? 
O18 K4 O62 157.0(6) . . ? 
O18 K4 O17 75.1(5) . 5_557 ? 
O62 K4 O17 98.7(6) . 5_557 ? 
O18 K4 O42 92.5(6) . 6_556 ? 
O62 K4 O42 109.0(6) . 6_556 ? 
O17 K4 O42 123.0(5) 5_557 6_556 ? 
O18 K4 O49 88.0(6) . 6_556 ? 
O62 K4 O49 96.4(6) . 6_556 ? 
O17 K4 O49 163.1(6) 5_557 6_556 ? 
O42 K4 O49 58.0(5) 6_556 6_556 ? 
O18 K4 O21 117.8(6) . 5_557 ? 
O62 K4 O21 73.1(6) . 5_557 ? 
O17 K4 O21 55.6(5) 5_557 5_557 ? 
O42 K4 O21 85.9(5) 6_556 5_557 ? 
O49 K4 O21 137.4(5) 6_556 5_557 ? 
O18 K4 O63 80.2(6) . 5_557 ? 
O62 K4 O63 77.9(6) . 5_557 ? 
O17 K4 O63 57.7(5) 5_557 5_557 ? 
O42 K4 O63 172.3(6) 6_556 5_557 ? 
O49 K4 O63 118.8(6) 6_556 5_557 ? 
O21 K4 O63 99.6(5) 5_557 5_557 ? 
O18 K4 O50 67.2(5) . 6_556 ? 
O62 K4 O50 131.6(6) . 6_556 ? 
O17 K4 O50 67.4(5) 5_557 6_556 ? 
O42 K4 O50 56.8(5) 6_556 6_556 ? 
O49 K4 O50 107.6(5) 6_556 6_556 ? 
O21 K4 O50 60.6(5) 5_557 6_556 ? 
O63 K4 O50 121.4(5) 5_557 6_556 ? 
O18 K4 W8 94.6(4) . 6_556 ? 
O62 K4 W8 99.7(5) . 6_556 ? 
O17 K4 W8 152.9(4) 5_557 6_556 ? 
O42 K4 W8 30.9(3) 6_556 6_556 ? 
O49 K4 W8 27.7(4) 6_556 6_556 ? 
O21 K4 W8 111.8(4) 5_557 6_556 ? 
O63 K4 W8 146.4(4) 5_557 6_556 ? 
O50 K4 W8 85.5(3) 6_556 6_556 ? 
O18 K4 W2 100.3(4) . 5_557 ? 
O62 K4 W2 80.2(5) . 5_557 ? 
O17 K4 W2 27.9(3) 5_557 5_557 ? 
O42 K4 W2 110.6(4) 6_556 5_557 ? 
O49 K4 W2 166.5(4) 6_556 5_557 ? 
O21 K4 W2 29.1(3) 5_557 5_557 ? 
O63 K4 W2 73.5(4) 5_557 5_557 ? 
O50 K4 W2 66.7(3) 6_556 5_557 ? 
W8 K4 W2 139.67(16) 6_556 5_557 ? 
O18 K4 W5 83.2(4) . 6_556 ? 
O62 K4 W5 119.4(5) . 6_556 ? 
O17 K4 W5 92.5(4) 5_557 6_556 ? 
O42 K4 W5 30.6(4) 6_556 6_556 ? 
O49 K4 W5 86.8(4) 6_556 6_556 ? 
O21 K4 W5 65.4(3) 5_557 6_556 ? 
O63 K4 W5 148.7(5) 5_557 6_556 ? 
O50 K4 W5 27.4(3) 6_556 6_556 ? 
W8 K4 W5 61.04(9) 6_556 6_556 ? 
W2 K4 W5 83.65(12) 5_557 6_556 ? 
O18 K4 K1 113.2(5) . 5_557 ? 
O62 K4 K1 44.1(5) . 5_557 ? 
O17 K4 K1 91.3(4) 5_557 5_557 ? 
O42 K4 K1 142.1(5) 6_556 5_557 ? 
O49 K4 K1 94.1(5) 6_556 5_557 ? 
O21 K4 K1 104.2(4) 5_557 5_557 ? 
O63 K4 K1 41.7(5) 5_557 5_557 ? 
O50 K4 K1 158.2(4) 6_556 5_557 ? 
W8 K4 K1 115.7(2) 6_556 5_557 ? 
W2 K4 K1 92.4(2) 5_557 5_557 ? 
W5 K4 K1 163.6(3) 6_556 5_557 ? 
O50 K5 O17 73.9(5) . 2_556 ? 
O50 K5 O74 74.5(10) . . ? 
O17 K5 O74 145.3(11) 2_556 . ? 
O50 K5 O16 97.4(5) . 2_556 ? 
O17 K5 O16 103.6(6) 2_556 2_556 ? 
O74 K5 O16 94.1(10) . 2_556 ? 
O50 K5 O1 153.8(6) . 6 ? 
O17 K5 O1 131.9(6) 2_556 6 ? 
O74 K5 O1 79.4(11) . 6 ? 
O16 K5 O1 82.3(6) 2_556 6 ? 
O50 K5 O18 70.0(5) . 6 ? 
O17 K5 O18 72.2(5) 2_556 6 ? 
O74 K5 O18 84.0(10) . 6 ? 
O16 K5 O18 167.3(6) 2_556 6 ? 
O1 K5 O18 109.6(6) 6 6 ? 
O50 K5 O63 132.7(6) . 6 ? 
O17 K5 O63 66.8(5) 2_556 6 ? 
O74 K5 O63 147.8(11) . 6 ? 
O16 K5 O63 68.7(6) 2_556 6 ? 
O1 K5 O63 71.7(6) 6 6 ? 
O18 K5 O63 118.6(6) 6 6 ? 
O50 K5 O5 117.9(5) . 6 ? 
O17 K5 O5 107.8(5) 2_556 6 ? 
O74 K5 O5 75.4(10) . 6 ? 
O16 K5 O5 137.7(6) 2_556 6 ? 
O1 K5 O5 55.7(5) 6 6 ? 
O18 K5 O5 53.9(5) 6 6 ? 
O63 K5 O5 98.8(5) 6 6 ? 
O50 K5 O11 70.0(5) . 2_556 ? 
O17 K5 O11 52.5(5) 2_556 2_556 ? 
O74 K5 O11 126.3(10) . 2_556 ? 
O16 K5 O11 53.6(5) 2_556 2_556 ? 
O1 K5 O11 126.6(5) 6 2_556 ? 
O18 K5 O11 118.2(5) 6 2_556 ? 
O63 K5 O11 65.6(5) 6 2_556 ? 
O5 K5 O11 157.9(5) 6 2_556 ? 
O50 K5 W3 147.5(4) . 6 ? 
O17 K5 W3 117.1(4) 2_556 6 ? 
O74 K5 W3 83.9(9) . 6 ? 
O16 K5 W3 108.3(4) 2_556 6 ? 
O1 K5 W3 26.8(4) 6 6 ? 
O18 K5 W3 84.0(4) 6 6 ? 
O63 K5 W3 76.7(4) 6 6 ? 
O5 K5 W3 31.0(3) 6 6 ? 
O11 K5 W3 141.9(3) 2_556 6 ? 
O50 K5 W1 95.6(4) . 6 ? 
O17 K5 W1 82.3(4) 2_556 6 ? 
O74 K5 W1 87.0(9) . 6 ? 
O16 K5 W1 166.8(5) 2_556 6 ? 
O1 K5 W1 85.0(4) 6 6 ? 
O18 K5 W1 25.9(4) 6 6 ? 
O63 K5 W1 103.9(4) 6 6 ? 
O5 K5 W1 30.4(3) 6 6 ? 
O11 K5 W1 134.6(4) 2_556 6 ? 
W3 K5 W1 58.70(9) 6 6 ? 
O50 K5 W6 84.4(4) . 2_556 ? 
O17 K5 W6 80.6(4) 2_556 2_556 ? 
O74 K5 W6 110.0(9) . 2_556 ? 
O16 K5 W6 24.1(4) 2_556 2_556 ? 
O1 K5 W6 102.8(4) 6 2_556 ? 
O18 K5 W6 146.7(4) 6 2_556 ? 
O63 K5 W6 64.5(4) 6 2_556 ? 
O5 K5 W6 157.4(4) 6 2_556 ? 
O11 K5 W6 29.5(3) 2_556 2_556 ? 
W3 K5 W6 126.36(17) 6 2_556 ? 
W1 K5 W6 162.2(2) 6 2_556 ? 
O74 K6 O57 83.7(12) 6_556 6_556 ? 
O74 K6 O6 137.2(13) 6_556 . ? 
O57 K6 O6 111.9(8) 6_556 . ? 
O74 K6 O36 105.4(12) 6_556 . ? 
O57 K6 O36 66.8(7) 6_556 . ? 
O6 K6 O36 53.2(6) . . ? 
O74 K6 O45 95.9(12) 6_556 . ? 
O57 K6 O45 153.8(9) 6_556 . ? 
O6 K6 O45 52.5(6) . . ? 
O36 K6 O45 88.3(7) . . ? 
O74 K6 O5 75.2(11) 6_556 . ? 
O57 K6 O5 104.8(8) 6_556 . ? 
O6 K6 O5 62.4(6) . . ? 
O36 K6 O5 52.4(5) . . ? 
O45 K6 O5 50.5(6) . . ? 
O74 K6 O65 133.4(12) 6_556 . ? 
O57 K6 O65 57.4(7) 6_556 . ? 
O6 K6 O65 85.0(7) . . ? 
O36 K6 O65 83.5(7) . . ? 
O45 K6 O65 130.5(9) . . ? 
O5 K6 O65 134.9(8) . . ? 
O74 K6 W4 132.9(12) 6_556 . ? 
O57 K6 W4 84.1(6) 6_556 . ? 
O6 K6 W4 28.1(4) . . ? 
O36 K6 W4 29.4(4) . . ? 
O45 K6 W4 76.9(5) . . ? 
O5 K6 W4 64.3(4) . . ? 
O65 K6 W4 72.3(6) . . ? 
O74 K6 W12 123.9(11) 6_556 . ? 
O57 K6 W12 141.0(7) 6_556 . ? 
O6 K6 W12 29.1(4) . . ? 
O36 K6 W12 78.6(5) . . ? 
O45 K6 W12 28.2(4) . . ? 
O5 K6 W12 63.7(4) . . ? 
O65 K6 W12 102.6(7) . . ? 
W4 K6 W12 57.0(3) . . ? 
O74 K6 W1 82.3(11) 6_556 . ? 
O57 K6 W1 79.4(6) 6_556 . ? 
O6 K6 W1 63.3(5) . . ? 
O36 K6 W1 28.2(4) . . ? 
O45 K6 W1 74.6(5) . . ? 
O5 K6 W1 27.4(3) . . ? 
O65 K6 W1 111.2(7) . . ? 
W4 K6 W1 50.7(2) . . ? 
W12 K6 W1 78.2(3) . . ? 
O74 K6 W3 77.0(10) 6_556 . ? 
O57 K6 W3 130.8(8) 6_556 . ? 
O6 K6 W3 62.5(5) . . ? 
O36 K6 W3 75.5(5) . . ? 
O45 K6 W3 26.9(4) . . ? 
O5 K6 W3 26.5(3) . . ? 
O65 K6 W3 147.4(7) . . ? 
W4 K6 W3 77.3(3) . . ? 
W12 K6 W3 49.3(2) . . ? 
W1 K6 W3 53.6(2) . . ? 
O74 K6 K5 33.7(10) 6_556 6_556 ? 
O57 K6 K5 90.9(7) 6_556 6_556 ? 
O6 K6 K5 104.2(6) . 6_556 ? 
O36 K6 K5 78.2(5) . 6_556 ? 
O45 K6 K5 75.5(5) . 6_556 ? 
O5 K6 K5 41.8(4) . 6_556 ? 
O65 K6 K5 147.8(7) . 6_556 ? 
W4 K6 K5 101.4(4) . 6_556 ? 
W12 K6 K5 99.4(4) . 6_556 ? 
W1 K6 K5 51.3(2) . 6_556 ? 
W3 K6 K5 50.2(2) . 6_556 ? 
K4 O62 K1 93.8(7) . 5_557 ? 
K1 O63 K4 92.1(7) . 5_557 ? 
K1 O63 K5 95.5(7) . 6_556 ? 
K4 O63 K5 147.5(8) 5_557 6_556 ? 
K3 O64 K2 44(5) 7_557 . ? 
O41 K7 O41 93.3(16) . 2_556 ? 
O41 K7 O67 124.3(8) . 2_556 ? 
O41 K7 O67 100.9(8) 2_556 2_556 ? 
O41 K7 O67 100.9(8) . . ? 
O41 K7 O67 124.3(8) 2_556 . ? 
O67 K7 O67 114(2) 2_556 . ? 
O41 K7 W6 25.1(3) . . ? 
O41 K7 W6 103.5(13) 2_556 . ? 
O67 K7 W6 140.8(7) 2_556 . ? 
O67 K7 W6 76.2(7) . . ? 
O41 K7 W6 103.5(13) . 2_556 ? 
O41 K7 W6 25.1(3) 2_556 2_556 ? 
O67 K7 W6 76.2(7) 2_556 2_556 ? 
O67 K7 W6 140.8(7) . 2_556 ? 
W6 K7 W6 121.4(13) . 2_556 ? 
O41 K7 K5 79.6(7) . . ? 
O41 K7 K5 71.1(6) 2_556 . ? 
O67 K7 K5 56.0(8) 2_556 . ? 
O67 K7 K5 164.3(13) . . ? 
W6 K7 K5 104.5(8) . . ? 
W6 K7 K5 52.3(3) 2_556 . ? 
O41 K7 K5 71.1(6) . 2_556 ? 
O41 K7 K5 79.6(7) 2_556 2_556 ? 
O67 K7 K5 164.3(13) 2_556 2_556 ? 
O67 K7 K5 56.0(8) . 2_556 ? 
W6 K7 K5 52.3(3) . 2_556 ? 
W6 K7 K5 104.5(8) 2_556 2_556 ? 
K5 K7 K5 136.8(12) . 2_556 ? 
K3 K8 K3 180.0(6) . 7_557 ? 
K3 K8 O37 62.8(5) . 7_557 ? 
K3 K8 O37 117.2(5) 7_557 7_557 ? 
K3 K8 O37 117.2(5) . . ? 
K3 K8 O37 62.8(5) 7_557 . ? 
O37 K8 O37 180.0(2) 7_557 . ? 
K3 K8 O44 121.2(5) . 7_557 ? 
K3 K8 O44 58.8(5) 7_557 7_557 ? 
O37 K8 O44 58.4(5) 7_557 7_557 ? 
O37 K8 O44 121.6(5) . 7_557 ? 
K3 K8 O44 58.8(5) . . ? 
K3 K8 O44 121.2(5) 7_557 . ? 
O37 K8 O44 121.6(5) 7_557 . ? 
O37 K8 O44 58.4(5) . . ? 
O44 K8 O44 180.0(5) 7_557 . ? 
K3 K8 O52 53.7(5) . 7_557 ? 
K3 K8 O52 126.3(5) 7_557 7_557 ? 
O37 K8 O52 49.7(5) 7_557 7_557 ? 
O37 K8 O52 130.3(5) . 7_557 ? 
O44 K8 O52 87.3(5) 7_557 7_557 ? 
O44 K8 O52 92.7(5) . 7_557 ? 
K3 K8 O52 126.3(5) . . ? 
K3 K8 O52 53.7(5) 7_557 . ? 
O37 K8 O52 130.3(5) 7_557 . ? 
O37 K8 O52 49.7(5) . . ? 
O44 K8 O52 92.7(5) 7_557 . ? 
O44 K8 O52 87.3(5) . . ? 
O52 K8 O52 180.000(3) 7_557 . ? 
K3 K8 K2 90.4(4) . 7_557 ? 
K3 K8 K2 89.6(4) 7_557 7_557 ? 
O37 K8 K2 90.3(4) 7_557 7_557 ? 
O37 K8 K2 89.7(4) . 7_557 ? 
O44 K8 K2 90.5(4) 7_557 7_557 ? 
O44 K8 K2 89.5(4) . 7_557 ? 
O52 K8 K2 47.1(4) 7_557 7_557 ? 
O52 K8 K2 132.9(4) . 7_557 ? 
K3 K8 K2 89.6(4) . . ? 
K3 K8 K2 90.4(4) 7_557 . ? 
O37 K8 K2 89.7(4) 7_557 . ? 
O37 K8 K2 90.3(4) . . ? 
O44 K8 K2 89.5(4) 7_557 . ? 
O44 K8 K2 90.5(4) . . ? 
O52 K8 K2 132.9(4) 7_557 . ? 
O52 K8 K2 47.1(4) . . ? 
K2 K8 K2 180.000(2) 7_557 . ? 
K3 K8 W4 63.7(3) . 7_557 ? 
K3 K8 W4 116.3(3) 7_557 7_557 ? 
O37 K8 W4 27.5(3) 7_557 7_557 ? 
O37 K8 W4 152.5(3) . 7_557 ? 
O44 K8 W4 65.0(4) 7_557 7_557 ? 
O44 K8 W4 115.0(4) . 7_557 ? 
O52 K8 W4 25.4(3) 7_557 7_557 ? 
O52 K8 W4 154.6(3) . 7_557 ? 
K2 K8 W4 62.97(16) 7_557 7_557 ? 
K2 K8 W4 117.03(16) . 7_557 ? 
K3 K8 W4 116.3(3) . . ? 
K3 K8 W4 63.7(3) 7_557 . ? 
O37 K8 W4 152.5(3) 7_557 . ? 
O37 K8 W4 27.5(3) . . ? 
O44 K8 W4 115.0(4) 7_557 . ? 
O44 K8 W4 65.0(4) . . ? 
O52 K8 W4 154.6(3) 7_557 . ? 
O52 K8 W4 25.4(3) . . ? 
K2 K8 W4 117.03(16) 7_557 . ? 
K2 K8 W4 62.97(16) . . ? 
W4 K8 W4 180.0 7_557 . ? 
K6 O74 K5 112.9(16) 6 . ? 
O76 O75 O80 113(8) . . ? 
O76 O75 K3 80(8) . 7_557 ? 
O80 O75 K3 49(7) . 7_557 ? 
O76 O75 K2 61(4) . . ? 
O80 O75 K2 52(6) . . ? 
K3 O75 K2 47(5) 7_557 . ? 
O75 O76 K3 64(7) . 7_557 ? 
O75 O76 K2 94(5) . . ? 
K3 O76 K2 53(5) 7_557 . ? 
K3 O79 K2 52(5) 7_557 . ? 
K3 O80 O75 81(10) 7_557 . ? 
K3 O80 K2 63(10) 7_557 . ? 
O75 O80 K2 98(8) . . ? 
O80 K3 O72 110(10) 7_557 7_557 ? 
O80 K3 O75 50(8) 7_557 7_557 ? 
O72 K3 O75 112(9) 7_557 7_557 ? 
O80 K3 O76 78(10) 7_557 7_557 ? 
O72 K3 O76 130(8) 7_557 7_557 ? 
O75 K3 O76 36(4) 7_557 7_557 ? 
O80 K3 K2 79(9) 7_557 7_557 ? 
O72 K3 K2 154(8) 7_557 7_557 ? 
O75 K3 K2 93(7) 7_557 7_557 ? 
O76 K3 K2 75(7) 7_557 7_557 ? 
O80 K3 O79 78(10) 7_557 7_557 ? 
O72 K3 O79 81(8) 7_557 7_557 ? 
O75 K3 O79 128(9) 7_557 7_557 ? 
O76 K3 O79 146(8) 7_557 7_557 ? 
K2 K3 O79 77(5) 7_557 7_557 ? 
O80 K3 O64 167(10) 7_557 7_557 ? 
O72 K3 O64 83(5) 7_557 7_557 ? 
O75 K3 O64 125(10) 7_557 7_557 ? 
O76 K3 O64 93(9) 7_557 7_557 ? 
K2 K3 O64 89(8) 7_557 7_557 ? 
O79 K3 O64 106(6) 7_557 7_557 ? 
O68 K3 O51 66.0(10) . . ? 
O68 K3 K8 127.7(10) . . ? 
O51 K3 K8 79.0(7) . . ? 
O68 K3 O52 133.2(11) . 7_557 ? 
O51 K3 O52 152.0(11) . 7_557 ? 
K8 K3 O52 72.9(7) . 7_557 ? 
O68 K3 O44 116.5(11) . . ? 
O51 K3 O44 57.7(6) . . ? 
K8 K3 O44 67.9(6) . . ? 
O52 K3 O44 110.2(8) 7_557 . ? 
O68 K3 O48 149.3(12) . . ? 
O51 K3 O48 112.6(8) . . ? 
K8 K3 O48 79.1(6) . . ? 
O52 K3 O48 62.7(7) 7_557 . ? 
O44 K3 O48 54.9(6) . . ? 
O68 K3 O20 54.4(10) . 7_557 ? 
O51 K3 O20 63.9(7) . 7_557 ? 
K8 K3 O20 76.0(7) . 7_557 ? 
O52 K3 O20 107.9(8) 7_557 7_557 ? 
O44 K3 O20 115.1(8) . 7_557 ? 
O48 K3 O20 155.1(10) . 7_557 ? 
O68 K3 O37 93.8(10) . 7_557 ? 
O51 K3 O37 112.0(8) . 7_557 ? 
K8 K3 O37 64.1(6) . 7_557 ? 
O52 K3 O37 54.6(6) 7_557 7_557 ? 
O44 K3 O37 132.0(9) . 7_557 ? 
O48 K3 O37 113.4(8) . 7_557 ? 
O20 K3 O37 53.3(6) 7_557 7_557 ? 
O68 K3 W11 86.8(9) . . ? 
O51 K3 W11 27.1(4) . . ? 
K8 K3 W11 76.8(4) . . ? 
O52 K3 W11 139.5(8) 7_557 . ? 
O44 K3 W11 31.5(4) . . ? 
O48 K3 W11 85.8(5) . . ? 
O20 K3 W11 89.8(6) 7_557 . ? 
O37 K3 W11 130.5(7) 7_557 . ? 
O68 K3 W4 111.3(9) . 7_557 ? 
O51 K3 W4 141.0(8) . 7_557 ? 
K8 K3 W4 73.5(4) . 7_557 ? 
O52 K3 W4 26.3(4) 7_557 7_557 ? 
O44 K3 W4 130.6(8) . 7_557 ? 
O48 K3 W4 88.9(6) . 7_557 ? 
O20 K3 W4 82.8(6) 7_557 7_557 ? 
O37 K3 W4 30.2(4) 7_557 7_557 ? 
W11 K3 W4 150.3(7) . 7_557 ? 
O68 K3 W15 134.0(10) . . ? 
O51 K3 W15 86.0(5) . . ? 
K8 K3 W15 76.8(4) . . ? 
O52 K3 W15 88.0(6) 7_557 . ? 
O44 K3 W15 28.9(4) . . ? 
O48 K3 W15 26.9(4) . . ? 
O20 K3 W15 142.5(7) 7_557 . ? 
O37 K3 W15 131.4(7) 7_557 . ? 
W11 K3 W15 59.0(2) . . ? 
W4 K3 W15 113.3(5) 7_557 . ? 
O68 K3 W10 67.5(9) . 7_557 ? 
O51 K3 W10 89.1(6) . 7_557 ? 
K8 K3 W10 74.7(4) . 7_557 ? 
O52 K3 W10 83.2(6) 7_557 7_557 ? 
O44 K3 W10 133.4(7) . 7_557 ? 
O48 K3 W10 141.9(8) . 7_557 ? 
O20 K3 W10 25.7(5) 7_557 7_557 ? 
O37 K3 W10 29.1(4) 7_557 7_557 ? 
W11 K3 W10 113.9(4) . 7_557 ? 
W4 K3 W10 57.4(2) 7_557 7_557 ? 
W15 K3 W10 151.5(7) . 7_557 ? 
 
_diffrn_measured_fraction_theta_max    0.991 
_diffrn_reflns_theta_full              27.57 
_diffrn_measured_fraction_theta_full   0.991 
_refine_diff_density_max   10.493 
_refine_diff_density_min   -7.549 
_refine_diff_density_rms    0.997 
